# Supplementary material for: Classification and biomarker identification using gene network modules and support vector machines
Source: Springer Nature journal article supplement (doi:10.1186/1471-2105-10-337), 2009-10-15

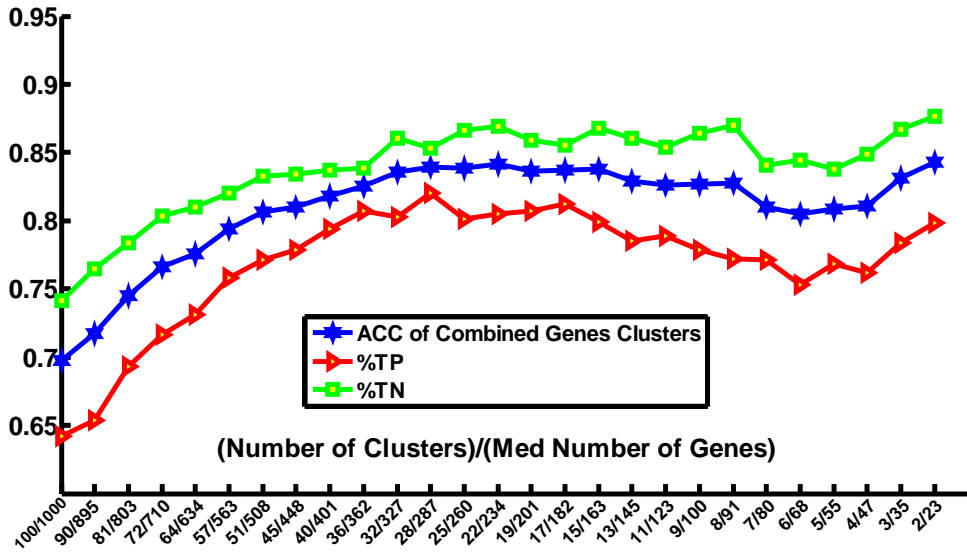

Supplement: 12859_2009_3067_MOESM2_ESM.pdf [file 12859_2009_3067_MOESM2_ESM.pdf]
